# Supplementary material for: Effect of fixed charge group concentration on equilibrium ion sorption in ion exchange membranes
Source: Royal Society of Chemistry journal article supplement (doi:10.1039/c6ta07954g), 2017-01-01
Supplement: c6ta07954g1.pdf [file c6ta07954g1.pdf]

# Effect of Fixed Charge Group Concentration on Equilibrium Ion Sorption in Ion Exchange Membranes

*Jovan Kamcev, Donald R. Paul, and Benny D. Freeman\**

McKetta Department of Chemical Engineering, Center for Energy and Environmental  
Resources, Texas Materials Institute, and Environmental and Water Resources Engineering

The University of Texas at Austin

10100 Burnet Road

Building 133 (CEER)

Austin, TX 78758 USA

To whom correspondence should be addressed: [freeman@che.utexas.edu](mailto:freeman@che.utexas.edu)

(Tel: +1-512-232-2803, Fax: +1-512-232-2807)

## Supporting Information

**S1.** Photographs of ion exchange membranes.

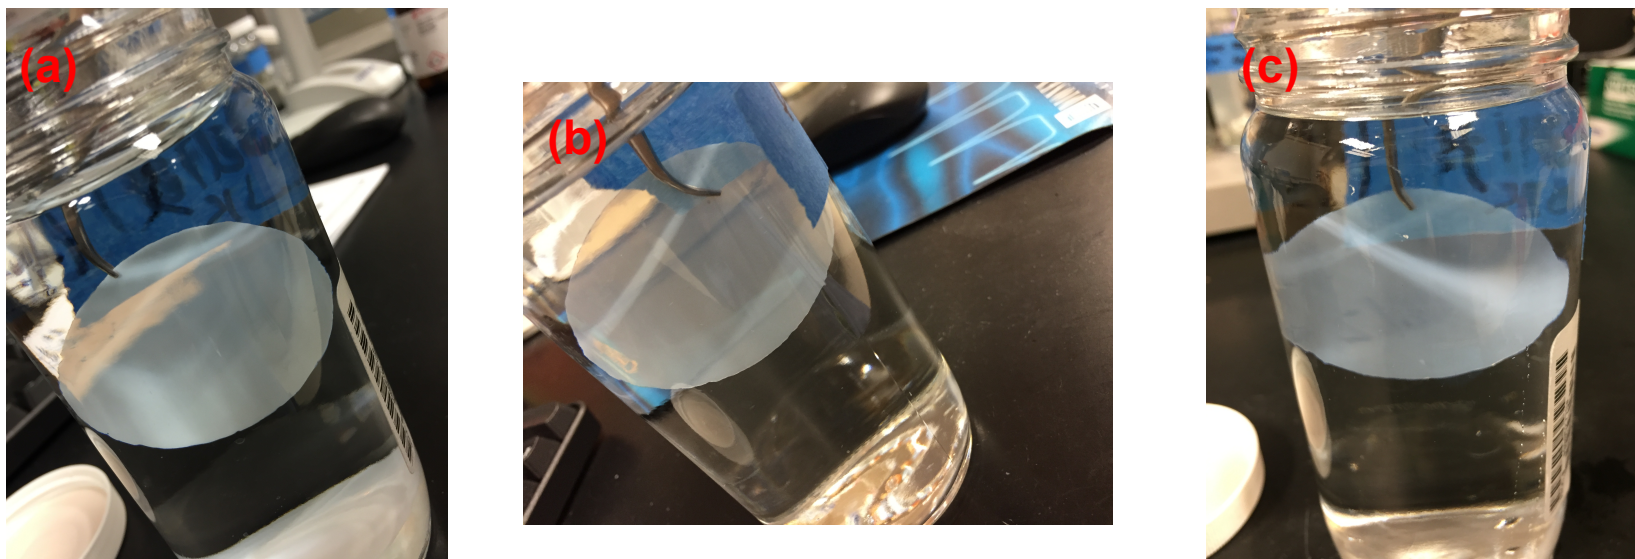

**Figure S1.** Photographs of: (a) CA200, (b) CA238, and (c) CA267 cation exchange membranes showing the cloudy nature of these membranes, suggesting structural inhomogeneity.

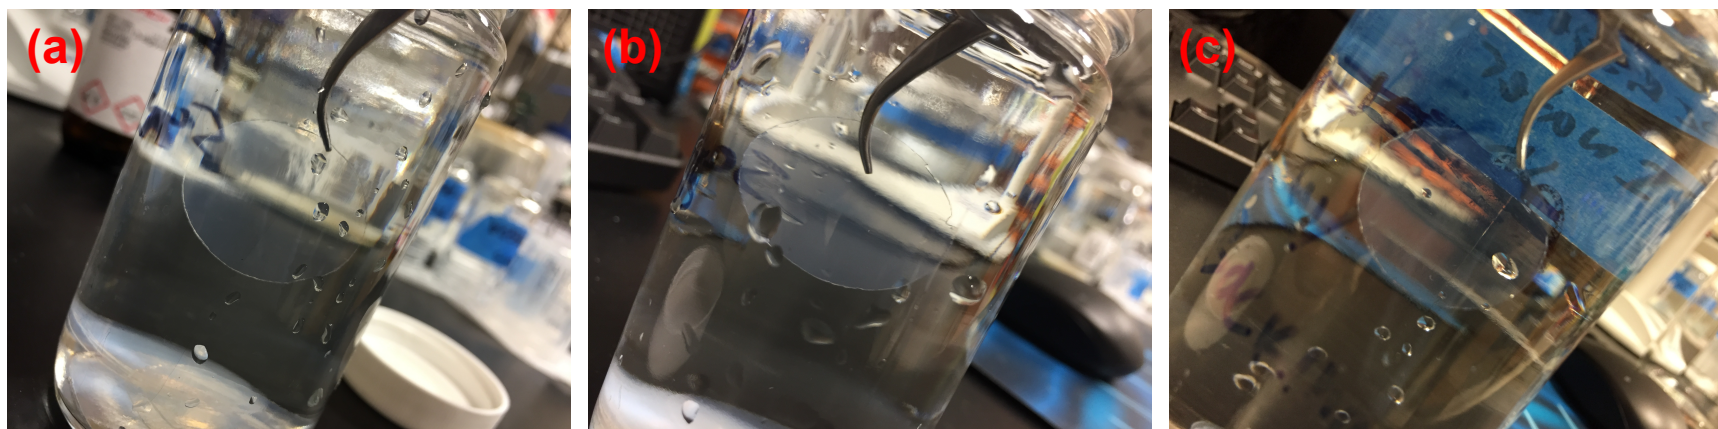

**Figure S2.** Photographs of: (a) AA200, (b) AA238, and (c) AA267 anion exchange membranes. These samples are essentially transparent, which is believed to reflect a more homogeneous structure than that of the CEMs shown in Figure S1.

## S2. Membrane water content

**Table S1.** Water content in cation exchange membranes.

| $C_s^s$ [mol/L] | CA200             |                   | CA238             |                   | CA267             |                   |
|-----------------|-------------------|-------------------|-------------------|-------------------|-------------------|-------------------|
|                 | $w_u$             | $\phi_w$          | $w_u$             | $\phi_w$          | $w_u$             | $\phi_w$          |
| <b>1</b>        | $0.861 \pm 0.007$ | $0.542 \pm 0.006$ | $0.851 \pm 0.014$ | $0.541 \pm 0.012$ | $0.843 \pm 0.004$ | $0.541 \pm 0.003$ |
| <b>0.3</b>      | $0.914 \pm 0.005$ | $0.556 \pm 0.005$ | $0.922 \pm 0.010$ | $0.561 \pm 0.008$ | $0.919 \pm 0.005$ | $0.563 \pm 0.004$ |
| <b>0.1</b>      | $0.943 \pm 0.009$ | $0.564 \pm 0.007$ | $0.945 \pm 0.016$ | $0.567 \pm 0.012$ | $0.941 \pm 0.009$ | $0.568 \pm 0.007$ |
| <b>0.03</b>     | $0.951 \pm 0.005$ | $0.566 \pm 0.004$ | $0.953 \pm 0.013$ | $0.569 \pm 0.010$ | $0.957 \pm 0.007$ | $0.573 \pm 0.005$ |
| <b>0.01</b>     | $0.957 \pm 0.006$ | $0.568 \pm 0.005$ | $0.955 \pm 0.013$ | $0.570 \pm 0.010$ | $0.953 \pm 0.004$ | $0.572 \pm 0.003$ |

**Table S2.** Water content in anion exchange membranes.

| $C_s^s$ [mol/L] | AA200             |                   | AA238             |                   | AA267             |                   |
|-----------------|-------------------|-------------------|-------------------|-------------------|-------------------|-------------------|
|                 | $w_u$             | $\phi_w$          | $w_u$             | $\phi_w$          | $w_u$             | $\phi_w$          |
| <b>1</b>        | $0.744 \pm 0.003$ | $0.484 \pm 0.003$ | $0.733 \pm 0.002$ | $0.479 \pm 0.002$ | $0.723 \pm 0.009$ | $0.475 \pm 0.009$ |
| <b>0.3</b>      | $0.781 \pm 0.003$ | $0.496 \pm 0.003$ | $0.776 \pm 0.003$ | $0.493 \pm 0.003$ | $0.767 \pm 0.005$ | $0.490 \pm 0.005$ |
| <b>0.1</b>      | $0.787 \pm 0.008$ | $0.498 \pm 0.008$ | $0.788 \pm 0.003$ | $0.497 \pm 0.003$ | $0.782 \pm 0.004$ | $0.495 \pm 0.004$ |
| <b>0.03</b>     | $0.798 \pm 0.004$ | $0.501 \pm 0.004$ | $0.795 \pm 0.007$ | $0.499 \pm 0.007$ | $0.793 \pm 0.005$ | $0.498 \pm 0.005$ |
| <b>0.01</b>     | $0.787 \pm 0.009$ | $0.498 \pm 0.009$ | $0.798 \pm 0.003$ | $0.500 \pm 0.003$ | $0.789 \pm 0.007$ | $0.497 \pm 0.007$ |



### S3. Membrane co-ion concentration

**Table 3.** Membrane co-ion concentration as a function of external NaCl concentration.

| $C_c^m$ [mol/L(sorbed water)] |                                |                                |                                |                                |                                |                                |
|-------------------------------|--------------------------------|--------------------------------|--------------------------------|--------------------------------|--------------------------------|--------------------------------|
| $C_s^s$<br>[mol/L]            | CA200                          | CA238                          | CA267                          | AA200                          | AA238                          | AA267                          |
| 1                             | $3.56 \pm 0.06 \times 10^{-1}$ | $2.66 \pm 0.04 \times 10^{-1}$ | $2.55 \pm 0.10 \times 10^{-1}$ | $4.70 \pm 0.16 \times 10^{-1}$ | $4.17 \pm 0.01 \times 10^{-1}$ | $3.84 \pm 0.11 \times 10^{-1}$ |
| 0.3                           | $5.07 \pm 0.07 \times 10^{-2}$ | $3.95 \pm 0.06 \times 10^{-2}$ | $3.46 \pm 0.08 \times 10^{-2}$ | $7.22 \pm 0.21 \times 10^{-2}$ | $6.52 \pm 0.27 \times 10^{-2}$ | $5.94 \pm 0.18 \times 10^{-2}$ |
| 0.1                           | $7.98 \pm 0.10 \times 10^{-3}$ | $6.68 \pm 0.14 \times 10^{-3}$ | $5.61 \pm 0.14 \times 10^{-3}$ | $1.44 \pm 0.03 \times 10^{-2}$ | $1.21 \pm 0.01 \times 10^{-2}$ | $1.19 \pm 0.03 \times 10^{-2}$ |
| 0.03                          | $1.04 \pm 0.03 \times 10^{-3}$ | $9.17 \pm 0.52 \times 10^{-4}$ | $7.67 \pm 0.28 \times 10^{-4}$ | $1.92 \pm 0.10 \times 10^{-3}$ | $1.69 \pm 0.04 \times 10^{-3}$ | $1.70 \pm 0.12 \times 10^{-3}$ |
| 0.01                          |                                |                                |                                | $2.88 \pm 0.23 \times 10^{-4}$ | $2.76 \pm 0.12 \times 10^{-4}$ | $2.62 \pm 0.17 \times 10^{-4}$ |

#### S4. Modeling results.

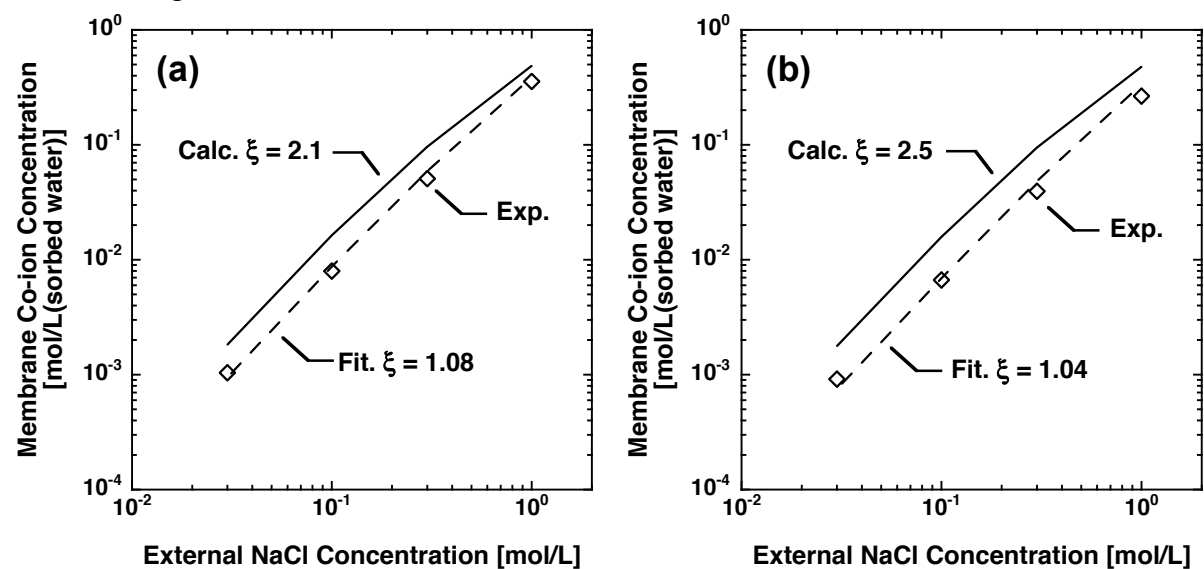

**Figure S3.** Experimental and calculated membrane co-ion concentrations as a function of external NaCl concentration for: (a) CEM CA200 and (b) CEM CA238. The solid lines represent co-ion concentrations calculated using  $\xi$  values estimated assuming a homogeneous membrane, and the dashed lines represent co-ion concentrations calculated by treating  $\xi$  as an adjustable parameter.

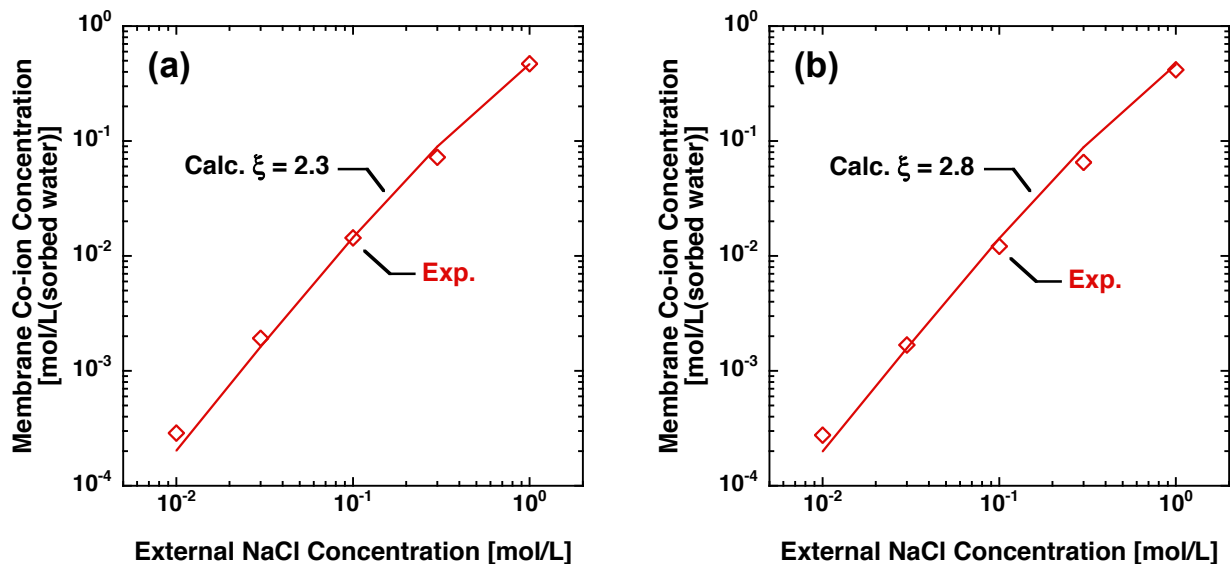

**Figure S4.** Experimental and calculated membrane co-ion concentrations as a function of external NaCl concentration for: (a) AEM AA200 and (b) AEM AA238. The solid lines represent co-ion concentrations calculated using  $\xi$  values estimated based on the membranes being homogeneous.
